# Supplementary material for: Exposure to fluctuating temperatures leads to reduced immunity and to stress response in rattlesnakes
Source: Oxford University Press journal article supplement (doi:10.1242/jeb.208645), 2019-01-01
Supplement: jeb208645supp.pdf [file jeb208645supp.pdf]

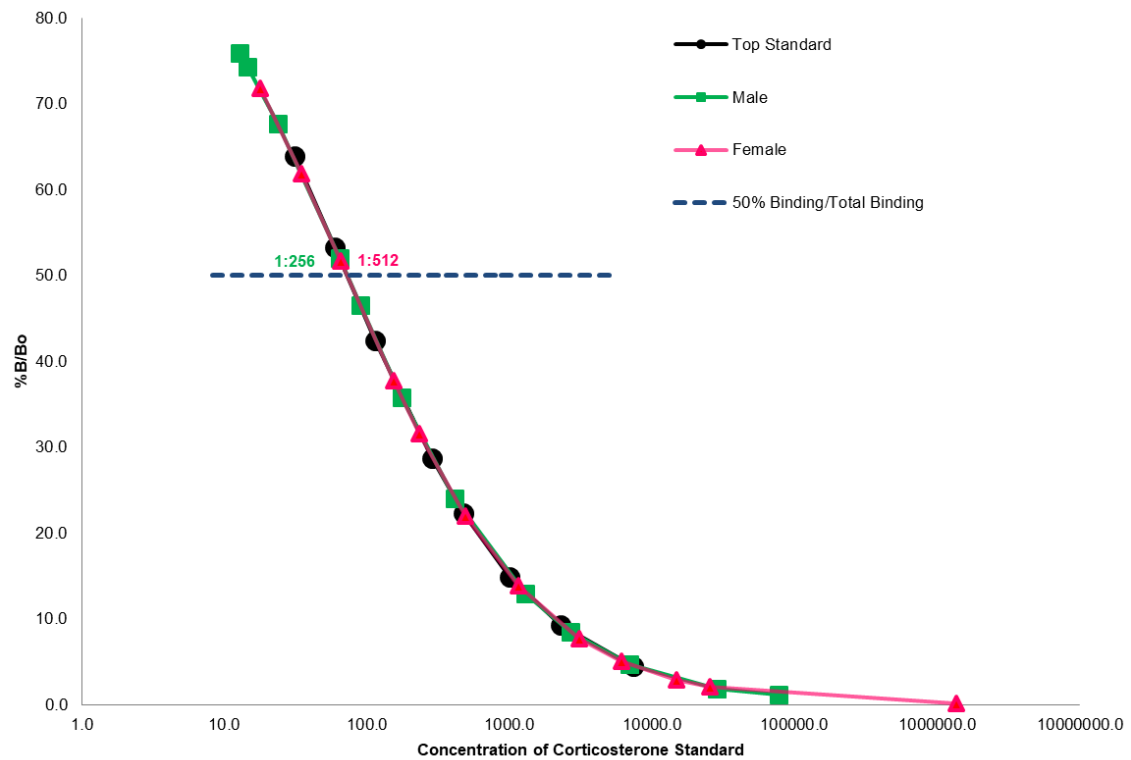

**Figure S1 – Parallelism curve. Binding displacement curves of serially diluted *Crotalus durissus* pooled plasma at baseline conditions against the corticosterone standard used in the corticosterone enzyme-immunoassay. The y axis represents the % Hormone Bound (%B)/Total Binding (Bo) measured at wave-length of 412 nm. The 50% binding point is denoted using a blue dashed line, with determined dilution factors for males (green) and females (red) extracted plasma samples.**

**Table S1.** Descriptive analysis of corticosterone plasmatic levels (CORT), bacteria killing ability (BKA), and heterophil:lymphocyte ratio (H:L) of rattlesnakes (*Crotalus durissus*) in the Constant-to-Fluctuating and Fluctuating-to-Constant treatments, after 2, 10, 14 and 22 days of exposure. Notice that the treatments are divided into two thermal regimes (Constant and Fluctuating).

| Treatment                             | Constant-to-Fluctuating |               |             |               |             |               |          |               | Fluctuating-to-Constant |               |          |               |             |               |          |               |
|---------------------------------------|-------------------------|---------------|-------------|---------------|-------------|---------------|----------|---------------|-------------------------|---------------|----------|---------------|-------------|---------------|----------|---------------|
|                                       | Constant                |               |             |               | Fluctuating |               |          |               | Fluctuating             |               |          |               | Constant    |               |          |               |
| Regime                                | Constant                |               | Fluctuating |               | Fluctuating |               | Constant |               | Fluctuating             |               | Constant |               | Fluctuating |               | Constant |               |
| Day                                   | 2                       | 10            | 14          | 22            | 2           | 10            | 14       | 22            | 2                       | 10            | 14       | 22            | 2           | 10            | 14       | 22            |
| Variables                             | N                       | Mean ± SE     | N           | Mean ± SE     | N           | Mean ± SE     | N        | Mean ± SE     | N                       | Mean ± SE     | N        | Mean ± SE     | N           | Mean ± SE     | N        | Mean ± SE     |
| <b>CORT (ng/ml)</b><br><b>Males</b>   | 8                       | 19.01 ± 2.89  | 8           | 26.16 ± 7.38  | 8           | 26.9 ± 7.95   | 7        | 28.82 ± 5.57  | 7                       | 22.93 ± 3.97  | 7        | 39.14 ± 11.03 | 7           | 13.72 ± 2.39  | 7        | 18.95 ± 5.2   |
| <b>CORT (ng/ml)</b><br><b>Females</b> | 4                       | 28.95 ± 20.12 | 4           | 26.3 ± 11.75  | 4           | 37.31 ± 21.1  | 4        | 20.86 ± 12.97 | 5                       | 29.42 ± 8.79  | 5        | 28.33 ± 5.51  | 5           | 15.81 ± 7.96  | 5        | 29.93 ± 4.06  |
| <b>BKA (%)</b><br><b>Males</b>        | 8                       | 56.76 ± 11.97 | 8           | 41.51 ± 12.3  | 8           | 58.55 ± 10.49 | 7        | 36.23 ± 10.46 | 7                       | 55.64 ± 14.68 | 7        | 61.23 ± 12.36 | 7           | 56.49 ± 8.41  | 7        | 45.12 ± 11.29 |
| <b>BKA (%)</b><br><b>Females</b>      | 4                       | 48.79 ± 19.42 | 4           | 41.89 ± 23.47 | 4           | 44.66 ± 4.14  | 4        | 42.28 ± 23.97 | 5                       | 44.97 ± 13.26 | 5        | 53.48 ± 21.36 | 5           | 47.65 ± 10.39 | 5        | 72.2 ± 12.8   |
| <b>H:L</b><br><b>Males</b>            | 8                       | 0.06 ± 0.02   | 8           | 0.12 ± 0.04   | 8           | 0.16 ± 0.03   | 7        | 0.16 ± 0.05   | 7                       | 0.09 ± 0.02   | 7        | 0.23 ± 0.06   | 7           | 0.18 ± 0.07   | 7        | 0.13 ± 0.03   |
| <b>H:L</b><br><b>Females</b>          | 4                       | 0.06 ± 0.02   | 4           | 0.11 ± 0.06   | 4           | 0.09 ± 0.03   | 4        | 0.05 ± 0.01   | 5                       | 0.05 ± 0.01   | 5        | 0.08 ± 0.03   | 5           | 0.05 ± 0.02   | 5        | 0.23 ± 0.18   |

N = valid N; Min = Minimum; Max = Maximum; SE = Standard Error.
